# Supplementary material for: Polyimide film with low thermal expansion and high transparency by self-enhancement of polyimide/SiC nanofibers net
Source: Royal Society of Chemistry journal article supplement (doi:10.1039/c8ra02479k), 2018-01-01
Supplement: c8ra02479k1.pdf [file c8ra02479k1.pdf]

## Polyimide Film with Low Thermal Expansion and High Transparency by Self-enhancement of Polyimide/SiC Nanofiber net

Feiyan Liu, Zhihong Liu, Shuyu Gao, Qingliang You, Liyong Zou, Jia, Chen, Jiyan Liu\*,  
Xueqing Liu\*

Key Laboratory of Optoelectronic Chemical Materials and Devices, Ministry of Education,

School of Chemical and Environmental Engineering, Jiangnan University, Wuhan 430056

Flexible Display Materials and Technology Co-Innovation Centre of Hubei Province,  
Jiangnan University, Wuhan 430056, China

**\*Corresponding author: Prof. X.Q. Liu (liuxueqing2000@163.com); Prof. Liu JY (liujiyan918@163.com)**

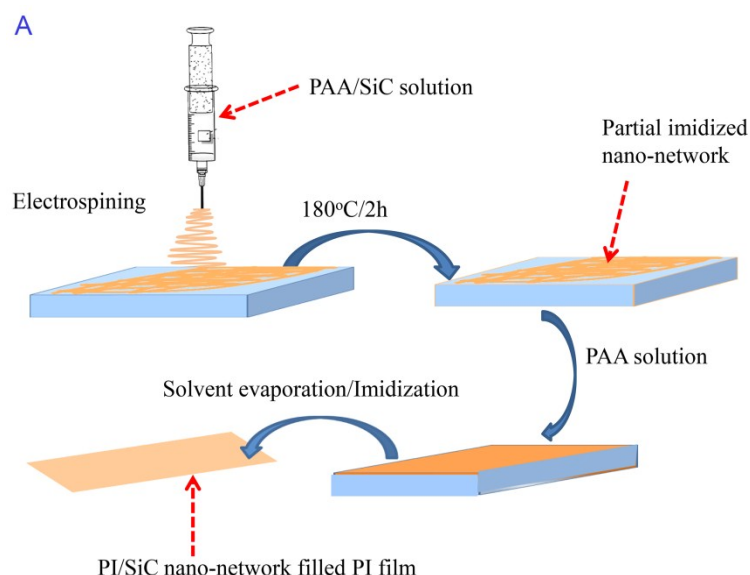

Fig. S1. Scheme of PI/SiC nanofibers filled PI film fabrication.

The determination of imidization degree of PAA with temperature

FTIR measurements have been applied to monitor the imidization reaction of the PI films at different temperature. Fig. S2 shows the changes in the FTIR spectra of BPDA/PDA for different imidization temperatures.

To study the imidization kinetics of PI films, the peak of aromatic ring (C=C) stretching around  $1510\text{ cm}^{-1}$  is chosen as a reference and the peak height method is adopted to calculate the amount of the appearing imide groups formed. The degree of imidization is defined by comparing the intensity of an imide absorption peak normalized to the intensity of the C=C reference band and is given by [16]:

$$(\text{Degree of imidization})_T = (A_{1510}/A_{1780})_T / (A_{1510}/A_{1780})_0$$

Where  $A_{1510}$  is the peak height of the C=C reference band at  $1510\text{ cm}^{-1}$  and  $A_{1780}$  is the imide peak height at  $1780\text{ cm}^{-1}$  in this study. Subscripts 0 and T indicate the reaction at the initial and a given imidization temperature, respectively.

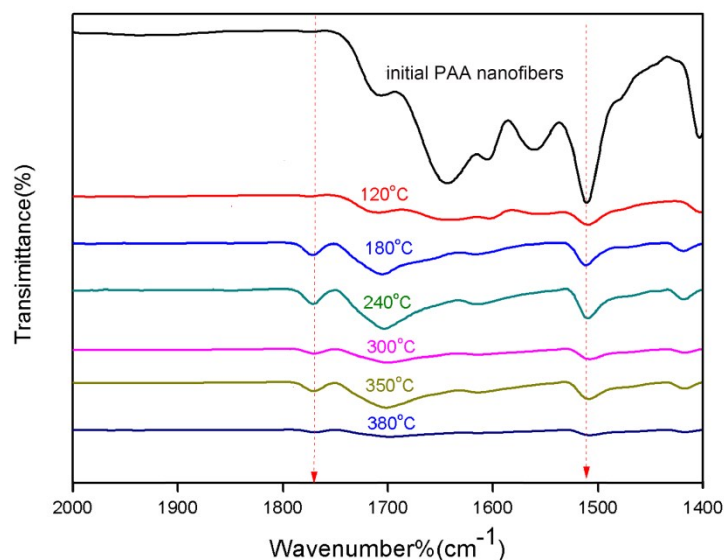

Fig. S2. FTIR spectra of PAA nanofibers at different temperature

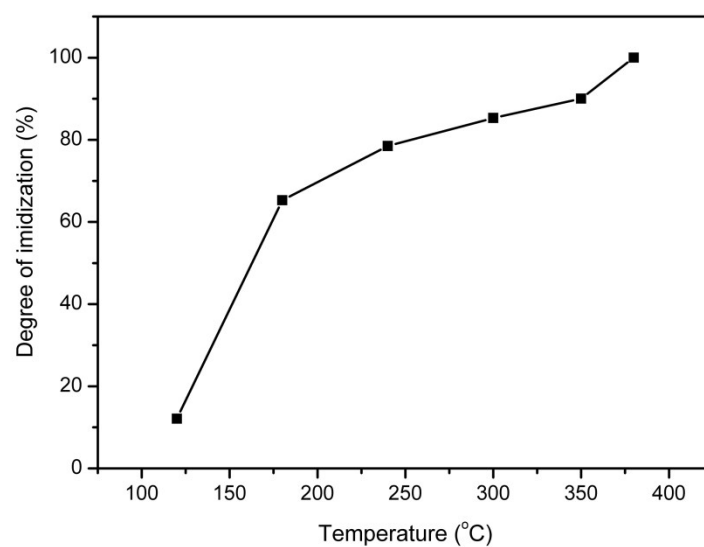

Fig. S3. Degree of the imidization reaction for the main absorption bands of the PAA nanofibers versus the imidization temperature.
